## **Ventilation heterogeneity is increased in adults exposed to coal mine fire-related PM<sub>2.5</sub>**

Thomas McCrabb BBiomedSc<sup>1,2</sup>, Brigitte Borg BAppSc CRFS ACP<sup>1,2</sup>, Caroline X. Gao BEng MBiostats PhD<sup>1,3</sup>, Catherine Smith BSc(Hons) MPH MSc<sup>1,3</sup>, David Brown BComp GradDipEd AssocDipAppSc<sup>1</sup>, Jillian Ikin BA(Psych) PhD<sup>1</sup>, Annie Makar BBiomedSc MHSM CRFS<sup>2</sup>, Tyler Lane BA MSc DPhil<sup>1</sup>, Michael J. Abramson MBBS(Hons) PhD FRACP<sup>1</sup>, Bruce R Thompson BAppSci PhD<sup>4</sup>

<sup>1</sup> School of Public Health & Preventive Medicine, Monash University, Melbourne, Australia

<sup>2</sup> Respiratory Medicine, Alfred Health, Melbourne, Australia

<sup>3</sup> Centre for Youth Mental Health (Orygen), University of Melbourne

<sup>4</sup> Melbourne School of Health Sciences, The University of Melbourne, Melbourne, Australia

Correspondence to:

Professor Michael Abramson  
School of Public Health & Preventive Medicine  
Monash University  
553 St Kilda Rd, Melbourne, Vic 3004  
Australia  
e-mail: [michael.abramson@monash.edu](mailto:michael.abramson@monash.edu)

Funding information:

This study was funded by the Victorian Department of Health. The paper presents the views of the authors and does not present the views of the Department.

## Abstract

**Background and Objectives:** The Hazelwood Health Study was set up to study long term health effects of a mine fire that blanketed residents of the Latrobe Valley with smoke for 45 days in 2014. The Respiratory Stream specifically assessed the impact of fine particulate matter <2.5 $\mu$ m diameter (PM<sub>2.5</sub>) exposure from mine fire smoke on lung health. The multiple breath nitrogen washout (MBW) test assesses ventilation heterogeneity, which may detect early airways dysfunction not identified using standard tests such as spirometry. This analysis assessed the association of PM<sub>2.5</sub> exposure with measures of ventilation heterogeneity.

**Methods:** Exposed (Morwell) and unexposed (Sale) participants were recruited 3.5-4 years after the fire from those who had participated in an Adult Survey. MBW was performed to measure lung clearance index (LCI), functional residual capacity (FRC), acinar (Sacin) and conductive (Scond) ventilation heterogeneity. PM<sub>2.5</sub> exposure was estimated with emission and chemical transport models. Multivariate linear regression models were fitted controlling for confounders.

**Results:** We recruited 519 participants. MBW tests were conducted on 504 participants with 479 acceptable test results (40% male; 313 exposed, 166 unexposed). Exposure to mine fire-related PM<sub>2.5</sub> was associated with increasing Scond ( $\beta=2.15/\text{kL}$ , 95%CI: 0.67-3.63,  $p=0.006$ ), which was comparable to the estimated effect on Scond of 7.9 years of aging. No other MBW outcomes were significant.

**Conclusions:** Increasing exposure to PM<sub>2.5</sub> was associated with increased ventilation heterogeneity in the conductive region of the lungs 4 years after the event.

**Keywords:** air pollution, multiple breath nitrogen washout, mine fire

Word count for abstract: 235

Word count for body of text: 2450

## Introduction

In 2014, a fire in the Hazelwood coal mine, in south-eastern Australia, blanketed the nearby town of Morwell in smoke for 45 days. The National Environment Protection Measure for fine particles < 2.5µm diameter (PM<sub>2.5</sub>) was exceeded on 27 days.<sup>1</sup> In response to community concerns around possible health impacts of the smoke on local residents, the Victorian State Government established the Hazelwood Health Study (HHS) to formally investigate long term health effects.

The Respiratory Stream of the HHS was set up to identify whether people exposed to the smoke from the mine fire have or develop over time clinical or sub-clinical respiratory conditions that may be associated with clinically important adverse health consequences in the future, compared to those who had minimal or no exposure.

In 2017-18, 3.5 to 4 years after the mine fire, the Respiratory Stream collected clinical data in Morwell (exposed) and Sale (unexposed). Findings reported so far included: asthmatics in Morwell had worse asthma control than those from Sale.<sup>2</sup> There was an association between PM<sub>2.5</sub> exposure and chest tightness and chronic cough particularly in smokers<sup>3</sup> and spirometric features of COPD in non-smokers.<sup>3</sup> There was also an association between PM<sub>2.5</sub> exposure and worsening lung mechanics measured with oscillometry.<sup>4</sup>

Presentation and diagnosis of respiratory symptoms can take years following exposure to PM<sub>2.5</sub>.<sup>5</sup> This may in part be due to the measurement tools used to monitor changes in physiology. Spirometry, the most common technique for assessing ventilatory function, is not particularly sensitive to detecting early changes in peripheral airway function, and disease may be quite advanced before abnormalities are detected. Multiple breath washout (MBW) is potentially a more sensitive and discriminating method in assessing peripheral airways dysfunction.<sup>5</sup> In a normal healthy lung, gas mixing should be even across the lung. In early lung pathology predominantly affecting peripheral airways, gas mixing becomes less efficient.<sup>6</sup> MBW assesses gas mixing (known as ventilation heterogeneity) within the lungs and hence may be a more appropriate tool for detecting early changes in airway function.

This cross-sectional analysis aimed to detect an association between mine fire-related PM<sub>2.5</sub> exposure and changes in the ventilation heterogeneity. If present, an association could be an early marker of small airways disease in the exposed population.

## Methods

### Study design and setting

This cross-sectional analysis studied data collected in the longitudinal Hazelwood Adult Study Respiratory stream.

### Participants and recruitment

Participants in this study were a sub-sample of the HHS Adult Survey participants (conducted 2016 and 2017).<sup>7</sup> A total of 3096 Morwell and 960 Sale residents provided responses in HHS Adult Survey. Sale was selected as a control group due to its similar rural setting, age distributions and socio-economic factors, and minimal exposure to the coal mine fire smoke.<sup>8</sup> Respondents were randomly selected to participate in the respiratory stream with those reporting current asthma medication or attacks of asthma oversampled. Detailed procedures have been published elsewhere.<sup>2,4</sup> In summary, clinical testing occurred in Morwell from August to December 2017 and Sale from January to March 2018. Pulmonary function tests (PFT), interviewer administered questionnaires and anthropometric measurements were collected by trained respiratory scientists. Study data were collected and managed using REDCap electronic data capture tool hosted and managed by Helix (Monash University)<sup>9</sup>.

Spirometry and MBW (nitrogen washout method) were performed on the EasyOne Pro<sup>TM</sup> Lab (ndd Medizintechnik AG, Zürich, CH) following the American Thoracic Society (ATS) and European Respiratory Society (ERS) guidelines<sup>10</sup> and the consensus statement for inert gas washout measurements.<sup>11</sup>

Standardization between staff and testing equipment was achieved with detailed study protocols and quality control procedures. This study obtained ethics approval from the Monash University Human Research Ethics Committee (project number: 1078) and the Alfred Ethics Committee (project number: 90/21). All participants provided written informed consent.

### Measures

#### *Exposure – PM<sub>2.5</sub>*

Due to a lack of ground-level air pollution monitoring at the early stage of the mine fire, retrospective modelling of the mine fire-related PM<sub>2.5</sub> concentration was conducted by the Commonwealth Scientific and Industrial Research Organisation (CSIRO) Oceans & Atmosphere.<sup>8</sup> The modelled spatial and temporal distribution of mine fire-related PM<sub>2.5</sub> were linked to time-

location diary data collected as a part of the Adult Survey to estimate individual-level mean daily mine fire-related PM<sub>2.5</sub> exposure over the fire period.<sup>12</sup>

### *MBW Outcomes*

MBW measures the efficiency of gas mixing in the lungs with four outcomes: Lung Clearance Index (LCI), Functional Residual Capacity (FRC), Sacin and Scond. Lung Clearance Index (LCI) is a global measure of ventilation heterogeneity, which measures the number of lung turnovers (TO) to eliminate nitrogen from the lungs. Functional Residual Capacity (FRC) is the end expiratory lung volume during tidal breathing. The analysis of the slope of the normalised nitrogen alveolar plateau (phase III slope) was performed to distinguish ventilation heterogeneity associated with the acinar (respiratory) zone (measured by Sacin) and the conductive zone (measured by Scond) of the lung. LCI and FRC were reported as the average of acceptable tests. Scond and Sacin were also reported as the average of acceptable tests and calculated<sup>13</sup> using WBreath research analysis software (nnd Medizintechnik AG, Zürich, Switzerland).

### *Covariates*

In this study we considered a range of potential confounders. Self-reported sex, employment history, highest level of completed education and occupational exposures (employment in dusty or polluted environments for at least 6 months) collected in the Adult Survey.<sup>7</sup> Age, ethnicity, height and weight were recorded during clinical testing. Smoking status and self-reported asthma were collected via interviewer administered surveys based on modified versions of the European Community Respiratory Health Survey (ECRHS).<sup>14</sup> Spirometric Chronic Obstructive Pulmonary Disease (COPD) was defined as post-bronchodilator FEV<sub>1</sub>/FVC z score < -1.64.<sup>3,15,16</sup>

### **Statistical Analysis**

Descriptive statistics were obtained for participant characteristics and clinical outcomes for four exposure groups: (1) non-exposed (Sale) participants, (2) low, (3) medium, and (4) high mine-fire smoke exposure. The low, medium and high exposure groups were assigned according to the tertiles of mine fire-related PM<sub>2.5</sub> concentrations in Morwell. Crude statistical comparisons between groups were made using Pearson  $\chi^2$  tests for categorical measures and one-way analysis of variance for continuous measures.

Multivariate linear regression models were fitted to evaluate associations between PM<sub>2.5</sub> exposure and individual outcomes, controlling for key confounders (see above). Statistical weights were developed to account for oversampling of asthmatics. To ensure the robustness of the findings, three models were fitted for each outcome: (1) unweighted complete cases model (missing data

excluded), (2) unweighted and imputed model, and (3) weighted and imputed model. All models were repeated including or excluding the residential location (Morwell/Sale) as a potential confounding factor which was also related to exposure.

Statistical analyses were performed using Stata version 16 (Stata Corporation, College Station, Texas 2016).

## Results

Altogether 519 adults (346 from Morwell and 173 from Sale) participated in the respiratory steam. MBW tests were conducted in 504 participants with 479 acceptable LCI and FRC test results (313 from Morwell and 166 from Sale). An additional two records were excluded for Sacin and 16 records for Scond due to not meeting acceptability criteria. Tests were not conducted for 15 participants (12 due to equipment issues and 3 due to contraindications to MBW testing).

Among the participants with acceptable MBW results, the characteristics were comparable between exposure groups, except for higher proportions of older and female participants in the non-exposed group (lower weight was likely to be a consequence of more female participants, see Table 1). There were some differences between participants who had acceptable MBW results and those who were not tested or had no acceptable results, who were older and less likely to be employed (see Table S1).

Distributions of LCI, FRC, Sacin and Scond are summarised by exposure groups in Figure 1 (descriptive statistics provided in Table S2). Participants from the unexposed group (Sale) had slightly higher unadjusted levels of FRC compared with exposed (Morwell) participants, which might be associated with heavier weight in Morwell participants. The unadjusted Sacin scores were also slightly higher in unexposed participants than low and medium exposed participants. On the other hand, unadjusted Scond was significantly higher in exposed than unexposed participants.

Multivariate linear regression models (Figure 2 and Table S3) suggested exposure to mine fire-related smoke was associated with higher Scond. For a 10  $\mu\text{g}/\text{m}^3$  increase in mean mine fire-related  $\text{PM}_{2.5}$  exposure, there was a 2.15 per kL (95%CI 0.67, 3.63) increase in Scond, estimated from the unweighted and unimputed model without exposure site (Morwell/Sale) as a covariate, see Figure 2. This effect was comparable to about 7.9 years of ageing on SCond estimated from the same model (2.73 per kL difference in Scond associated with 10 years age difference), see Table S3. Consistent effects were estimated from imputed and/or weighted models with slightly smaller

effects in weighted models, which primarily give lower weight to older participants who were more likely to participate in the respiratory stream testing.

Although Sacin was not associated with PM<sub>2.5</sub> exposure, it was higher in former and current smokers and those with spirometric COPD or a self-reported asthma attack in the last 12 months (Table S4).

## Discussion

A period of four years after the 2014 Hazelwood mine fire, we found PM<sub>2.5</sub> exposure was associated with greater ventilatory heterogeneity in the small proximal conducting airways (Scond) of the lung, but no evidence of association with peripheral ventilatory heterogeneity (Sacin), FRC or LCI. The effect on Scond exceeded known age effects, which suggests exposure to coal mine fire-related PM<sub>2.5</sub> led to premature lung ageing.<sup>17</sup> To our knowledge, this is the first publication looking at the effects of PM<sub>2.5</sub> exposure from a landscape fire (e.g., wildfire and mine fire) on ventilation heterogeneity using modern methods in adults.

The association of PM<sub>2.5</sub> from an open cut coal mine fire and Scond increase is a novel finding. Negative outcomes related to PM<sub>2.5</sub> exposure<sup>18</sup> are motivating research into various PM<sub>2.5</sub> sources such as wildfires, traffic pollution and residential indoor combustion. While wildfires may emit similar pollutants, the duration and intensity are different from the Hazelwood event – which may result in different physiological outcomes. MBW is an established clinical tool with the most commonly used outcome measure being the LCI.<sup>6</sup> Current studies of ventilation heterogeneity partitioned by ventilatory region are aimed at early identification or interventions in patients with asthma,<sup>19</sup> COPD,<sup>20</sup> lung transplantation<sup>21</sup> and cystic fibrosis<sup>22</sup>. Partitioning of ventilation heterogeneity by ventilatory region may provide further insights into lung pathophysiology due to PM<sub>2.5</sub> exposure.

The changes seen in ventilatory heterogeneity in the current study agree with our previous analysis of airway mechanics in the same cohort. In that study,<sup>4</sup> it was demonstrated that reactance in the peripheral airways (Xrs5) became more negative (worsened) with an increase in the corresponding area under the curve (AX5) as exposure to PM<sub>2.5</sub> increased, suggesting airway closure commenced at a higher lung volume. Such changes in the airway closure may impact on Scond.<sup>23</sup>

The mechanism behind PM<sub>2.5</sub> exposure increasing Scond is unclear, but there are a few possible explanations. In smokers with normal spirometry, increased bronchomotor (airway muscle) tone

had a negative impact on Scond while not affecting Sacin.<sup>24,25</sup> While the exposure here was shorter term and less intense than smoking, this provides a plausible mechanism for our findings. PM<sub>2.5</sub> is small enough to deposit within the small airways proximal to the acinar entrance.<sup>26</sup> The increase in Scond could mean particles are depositing within these airways, potentially affecting smooth muscle tone and convective gas mixing.<sup>27</sup> Verbanck et al, showed normalisation of Scond in smokers with preserved spirometry on cessation of smoking over a few weeks to months,<sup>28</sup> which might reflect recovery of airway inflammation. The association between increasing PM<sub>2.5</sub> exposure and Scond may reflect increased bronchomotor tone or airway inflammation in the conductive region of the lung.

The lack of a significant change in Sacin suggests limited deposition in the peripheral airways. We cannot determine from this study why PM<sub>2.5</sub> from the fire did not appear to have a detectable effect on Sacin. Based on evidence that Sacin was increased among smokers,<sup>29,30</sup> we expected that PM<sub>2.5</sub> exposure would increase Sacin heterogeneity because its small size would also allow it to reach the acinar region of the lungs. However, this was not supported by our findings. A possible reason for Sacin to not be altered in those exposed to the coal mine smoke may be due to overall particle size distribution. We know particles around 2.5 µm will deposit in airways proximal to the acinar entrance. Particles finer than 2 µm have been demonstrated to deposit peripheral to the acinar entrance by a process of diffusion. However, it has also been demonstrated that particles <1.8 µm have greater exhalation, ie. these particles are inhaled but then exhaled from the lung.<sup>31</sup> It is possible that the overall particle size was not ultrafine and hence significant particle deposition in airways peripheral to the acinar entrance did not occur.

Although this study was not specifically designed to detect the effects of smoking on MBW outcomes, we confirmed prior evidence regarding impact of smoking on ventilation heterogeneity as we also found an association between increased Sacin and current and ex-smokers.<sup>29,30</sup> These findings align with previous work on Sacin and suggests the measurements in the current study were valid. Sacin was influenced by tobacco smoke exposure, but not from the mine fire smoke, or at least not several years after the exposure.

### **Strengths and limitations**

A major strength was utilising an objective non-invasive clinical measurement that required minimal exertion from the participant following standardised procedures. A further strength was estimating individual PM<sub>2.5</sub> exposure. Statistical models were fitted to adjust for known confounders with sample weighting and imputation of missing data to allow for comparison with complete case models.



However, this study also had some limitations. A lengthy (two-hour) clinical visit and reduced engagement from those with more symptoms might have biased the study. Relevant physiological (age, weight, height, sex) and demographic (occupation, education, smoking) cofounders were addressed. However, residual confounding may still have influenced the results. There were no data from before the mine fire and therefore we could not exclude pre-existing differences in ventilation heterogeneity. Although the effects of gaseous air pollutants could not be excluded, carbon monoxide was highly collinear with PM<sub>2.5</sub>.<sup>8</sup> The findings might not be generalisable to culturally and linguistically more diverse communities exposed to landscape fire smoke elsewhere.

## **Conclusion**

There was a clear association between PM<sub>2.5</sub> exposure from the coal mine fire smoke and increased heterogeneity in the conductive airways. This study adds to the limited literature on health effects of coal mine fire smoke exposure. More frequent similar events are expected as climate change accelerates. Future town planning should account for the health risks associated with decommissioned coal mines nearby. Further studies can build on these novel findings for early detection and treatment of those most affected. Follow-up investigations should identify the trajectory of ventilation heterogeneity and improve understanding of mechanisms from similar exposures.

## **Acknowledgments**

The Hazelwood Health Study is funded by the Victorian Department of Health. However this paper presents the views of the authors and not those of the Department. We wish to thank the following people who assisted in conducting the study, but are not named authors: Susan Denny, Kylie Sawyer, Shantelle Allgood and Kristina Thomas. We wish to thank CSIRO for air pollution modelling and Danny Brazzale for reviewing the paper. Most of all, the study team would like to acknowledge the contributions of all community members who have participated in the study to date.

## References

- 1 Reisen F, Fisher G, Torre P, Marshall A, Cope M, Emmerson K, *et al.* Analysis of air quality during the Hazelwood mine fire. 2016, Environment Protection Authority Victoria, Carlton, <https://www.epa.vic.gov.au/-/media/epa/files/publications/1648.pdf> Accessed: 2/12/2022
- 2 Taylor S, Borg B, Gao C, Brown D, Hoy R, Makar A, *et al.* The impact of the Hazelwood coal mine fire smoke exposure on asthma. *J Asthma*. 2022; **59**: 213-22. doi: 10.1080/02770903.2020.1847931
- 3 Prasad S, Gao CX, Borg B, Broder J, Brown D, Ikin JF, *et al.* Chronic Obstructive Pulmonary Disease in Adults Exposed to Fine Particles from a Coal Mine Fire. *Ann Am Thorac Soc*. 2022; **19**: 186-95. doi: 10.1513/AnnalsATS.202012-1544OC
- 4 Holt NR, Gao CX, Borg BM, Brown D, Broder JC, Ikin J, *et al.* Long-term impact of coal mine fire smoke on lung mechanics in exposed adults. *Respirology*. 2021; **26**: 861-8. doi: 10.1111/resp.14102
- 5 Li R, Zhou R, Zhang J. Function of PM<sub>2.5</sub> in the pathogenesis of lung cancer and chronic airway inflammatory diseases (Review). *Oncol Lett*. 2018; **15**: 7506-14. doi: 10.3892/ol.2018.8355
- 6 Stanojevic S, Bowerman C, Robinson P. Multiple breath washout: measuring early manifestations of lung pathology. *Breathe*. 2021; **17**: 210016. doi: 10.1183/20734735.0016-2021
- 7 Ikin J, Carroll MTC, Walker J, Borg B, Brown D, Cope M, *et al.* Cohort Profile: The Hazelwood Health Study Adult Cohort. *International Journal of Epidemiology*. 2020; **49**: 1777-8. doi: 10.1093/ije/dyaa083
- 8 Luhar AK, Emmerson KM, Reisen F, Williamson GJ, Cope ME. Modelling smoke distribution in the vicinity of a large and prolonged fire from an open-cut coal mine. *Atmos Environ*. 2020; **229**: 117471. doi: <https://doi.org/10.1016/j.atmosenv.2020.117471>
- 9 Harris PA, Taylor R, Thielke R, Payne J, Gonzalez N, Conde JG. Research electronic data capture (REDCap)--a metadata-driven methodology and workflow process for providing translational research informatics support. *J Biomed Inform*. 2009; **42**: 377-81. doi: 10.1016/j.jbi.2008.08.010

- 10 Miller MR, Hankinson J, Brusasco V, Burgos F, Casaburi R, Coates A, *et al.* Standardisation of spirometry. *Eur Respir J.* 2005; **26**: 319-38. doi: DOI: 10.1183/09031936.05.00034805
- 11 Robinson PD, Latzin P, Verbanck S, Hall GL, Horsley A, Gappa M, *et al.* Consensus statement for inert gas washout measurement using multiple- and single- breath tests. *Eur Respir J.* 2013; **41**: 507-22. doi: 10.1183/09031936.00069712
- 12 Johnson AL, Gao CX, Dennekamp M, Williamson GJ, Brown D, Carroll MTC, *et al.* Associations between Respiratory Health Outcomes and Coal Mine Fire PM<sub>2.5</sub> Smoke Exposure: A Cross-Sectional Study. *International Journal of Environmental Research and Public Health.* 2019; **16**: 4262. doi: 10.3390/ijerph16214262
- 13 Stuart-Andrews CR, Kelly VJ, Sands SA, Lewis AJ, Ellis MJ, Thompson BR. Automated detection of the phase III slope during inert gas washout testing. *J Appl Physiol.* 2012; **112**: 1073-81. doi: 10.1152/jappphysiol.00372.2011
- 14 ECRHS Steering Committee. The European Community Respiratory Health Survey II. *Eur Respir J.* 2002; **20**: 1071-9. doi: 10.1183/09031936.02.00046802
- 15 Rabe KF, Hurd S, Anzueto A, Barnes PJ, Buist SA, Calverley P, *et al.* Global Strategy for the Diagnosis, Management, and Prevention of Chronic Obstructive Pulmonary Disease. *American Journal of Respiratory and Critical Care Medicine.* 2007; **176**: 532-55. doi: 10.1164/rccm.200703-456SO
- 16 Quanjer PH, Stanojevic S, Cole TJ, Baur X, Hall GL, Culver BH, *et al.* Multi-ethnic reference values for spirometry for the 3-95-yr age range: the global lung function 2012 equations. *Eur Respir J.* 2012; **40**: 1324-43. doi: 10.1183/09031936.00080312
- 17 Htun C, Pope A, Lahzami S, Luo D, Schoeffel RE, Farrow CE, *et al.* Contribution of peripheral airway function to changes in FEV<sub>1</sub>/FVC and RV/TLC with aging. *J Appl Physiol.* 2018; **125**: 1378-83. doi: 10.1152/jappphysiol.00114.2018
- 18 Atkinson RW, Kang S, Anderson HR, Mills IC, Walton HA. Epidemiological time series studies of PM<sub>2.5</sub> and daily mortality and hospital admissions: a systematic review and meta-analysis. *Thorax.* 2014; **69**: 660-5. doi: 10.1136/thoraxjnl-2013-204492

- 19 O'Sullivan CF, Nilsen K, Borg B, Ellis M, Matsas P, Thien F, *et al.* Small airways dysfunction is associated with increased exacerbations in patients with asthma. *J Appl Physiol* (1985). 2022; **133**: 629-36. doi: 10.1152/jappphysiol.00103.2022
- 20 Day K, Ostridge K, Conway J, Cellura D, Watson A, Spalluto CM, *et al.* Interrelationships Among Small Airways Dysfunction, Neutrophilic Inflammation, and Exacerbation Frequency in COPD. *Chest*. 2021; **159**: 1391-9. doi: 10.1016/j.chest.2020.11.018
- 21 Thompson BR, Hodgson YM, Kotsimbos T, Liakakos P, Ellis MJ, Snell GI, *et al.* Bronchiolitis obliterans syndrome leads to a functional deterioration of the acinus post lung transplant. *Thorax*. 2014; **69**: 487-8. doi: 10.1136/thoraxjnl-2013-204671
- 22 Verbanck S, King GG, Zhou W, Miller A, Thamrin C, Schuermans D, *et al.* The quantitative link of lung clearance index to bronchial segments affected by bronchiectasis. *Thorax*. 2018; **73**: 82-4. doi: 10.1136/thoraxjnl-2017-210496
- 23 Nilsen K, Thien F, Thamrin C, Ellis MJ, Prisk GK, King GG, *et al.* Early onset of airway derecruitment assessed using the forced oscillation technique in subjects with asthma. *J Appl Physiol*. 2019; **126**: 1399-408. doi: 10.1152/jappphysiol.00534.2018
- 24 Jetmalani K, Chapman DG, Thamrin C, Farah CS, Berend N, Salome CM, *et al.* Bronchodilator responsiveness of peripheral airways in smokers with normal spirometry. *Respirology*. 2016; **21**: 1270-6. doi: 10.1111/resp.12802
- 25 Irvin CG. Chapter 5 - Pulmonary Physiology. In: Barnes PJ, Drazen JM, Rennard SI, Thomson NC, (eds.) *Asthma and COPD (Second Edition)*. Academic Press, Oxford, 2009; 53-69.
- 26 Xing YF, Xu YH, Shi MH, Lian YX. The impact of PM<sub>2.5</sub> on the human respiratory system. *Journal of thoracic disease*. 2016; **8**: E69-74. doi: 10.3978/j.issn.2072-1439.2016.01.19
- 27 Li D, Li Y, Li G, Zhang Y, Li J, Chen H. Fluorescent reconstitution on deposition of PM<sub>2.5</sub> in lung and extrapulmonary organs. *Proc Natl Acad Sci U S A*. 2019; **116**: 2488-93. doi: 10.1073/pnas.1818134116
- 28 Verbanck S, Schuermans D, Paiva M, Meysman M, Vincken W. Small airway function improvement after smoking cessation in smokers without airway obstruction. *Am J Respir Crit Care Med*. 2006; **174**: 853-7. doi: 10.1164/rccm.200603-422OC

- 29 Jarenbäck L, Ankerst J, Bjermer L, Tufvesson E. Ventilation heterogeneity in COPD and healthy smokers relates to diffusion capacity, resistance and reactance. *Eur Respir J*. 2015; **46**: PA1031. doi: 10.1183/13993003.congress-2015.PA1031
- 30 Verbanck S, Schuermans D, Meysman M, Paiva M, Vincken W. Noninvasive assessment of airway alterations in smokers: the small airways revisited. *Am J Respir Crit Care Med*. 2004; **170**: 414-9. doi: 10.1164/rccm.200401-037OC
- 31 Usmani OS, Biddiscombe MF, Barnes PJ. Regional Lung Deposition and Bronchodilator Response as a Function of  $\beta$ 2-Agonist Particle Size. *Am J Respir Crit Care Med*. 2005; **172**: 1497-504. doi: 10.1164/rccm.200410-1414OC

## Tables and Figures

Table 1. Characteristics of 479 participants who had acceptable MBW test results.

| Characteristic                                                                | Sale non-exposed<br>N=166 | Morwell low exposure<br>N=97 | Morwell medium exposure<br>N=100 | Morwell high exposure<br>N=116 | P-value |
|-------------------------------------------------------------------------------|---------------------------|------------------------------|----------------------------------|--------------------------------|---------|
| Age group, n (%)                                                              |                           |                              |                                  |                                | 0.753   |
| 18-44 years                                                                   | 44 (27%)                  | 34 (35%)                     | 34 (34%)                         | 35 (30%)                       |         |
| 45-64 years                                                                   | 73 (44%)                  | 38 (39%)                     | 36 (36%)                         | 49 (42%)                       |         |
| ≥ 65 years                                                                    | 49 (30%)                  | 25 (26%)                     | 30 (30%)                         | 32 (28%)                       |         |
| Male, n (%)                                                                   | 58 (35%)                  | 36 (37%)                     | 40 (40%)                         | 57 (49%)                       | 0.105   |
| Ethnicity Caucasian / White, n (%)                                            | 164 (99%)                 | 96 (99%)                     | 99 (99%)                         | 115 (99%)                      | 0.994   |
| Employed                                                                      | 88 (53%)                  | 42 (43%)                     | 45 (45%)                         | 48 (41%)                       | 0.209   |
| Certificate, University or other Tertiary Institute degree, n (%)             | 102 (62%)                 | 52 (54%)                     | 51 (52%)                         | 69 (60%)                       | 0.366   |
| BMI, n (%)                                                                    |                           |                              |                                  |                                | 0.004   |
| Underweight/Normal (BMI<25kg/m <sup>2</sup> )                                 | 37 (22%)                  | 21 (22%)                     | 19 (19%)                         | 13 (11%)                       |         |
| Overweight (25≤BMI<30 kg/m <sup>2</sup> )                                     | 66 (40%)                  | 32 (33%)                     | 25 (25%)                         | 32 (28%)                       |         |
| Obese (BMI≥30 kg/m <sup>2</sup> )                                             | 63 (38%)                  | 44 (45%)                     | 56 (56%)                         | 71 (61%)                       |         |
| Smoking status, n (%)                                                         |                           |                              |                                  |                                | 0.176   |
| Non-smoker                                                                    | 77 (46%)                  | 53 (55%)                     | 55 (55%)                         | 45 (39%)                       |         |
| Ex-smoker                                                                     | 65 (39%)                  | 31 (32%)                     | 29 (29%)                         | 48 (41%)                       |         |
| Current smoker                                                                | 24 (14%)                  | 13 (13%)                     | 16 (16%)                         | 23 (20%)                       |         |
| Spirometric COPD or self-reported asthma attack in the last 12 months, n (%)  | 70 (42%)                  | 51 (53%)                     | 49 (49%)                         | 58 (50%)                       | 0.351   |
| Historical occupational exposure, n (%)                                       | 63 (38%)                  | 37 (38%)                     | 37 (37%)                         | 50 (43%)                       | 0.778   |
| Age/ years, mean (SD)                                                         | 55 (15)                   | 52(16)                       | 53 (16)                          | 54 (16)                        | 0.511   |
| Height / cm, mean (SD)                                                        | 167 (9)                   | 165 (10)                     | 166 (10)                         | 167(9)                         | 0.531   |
| Weight / kg, mean (SD)                                                        | 81 (16)                   | 85 (21)                      | 86 (19)                          | 89 (18)                        | 0.002   |
| Mean exposure to fire related PM <sub>2.5</sub> µg/m <sup>3</sup> , mean (SD) | <0.1                      | 6 (2)                        | 11 (2)                           | 27(11)                         | <0.001  |

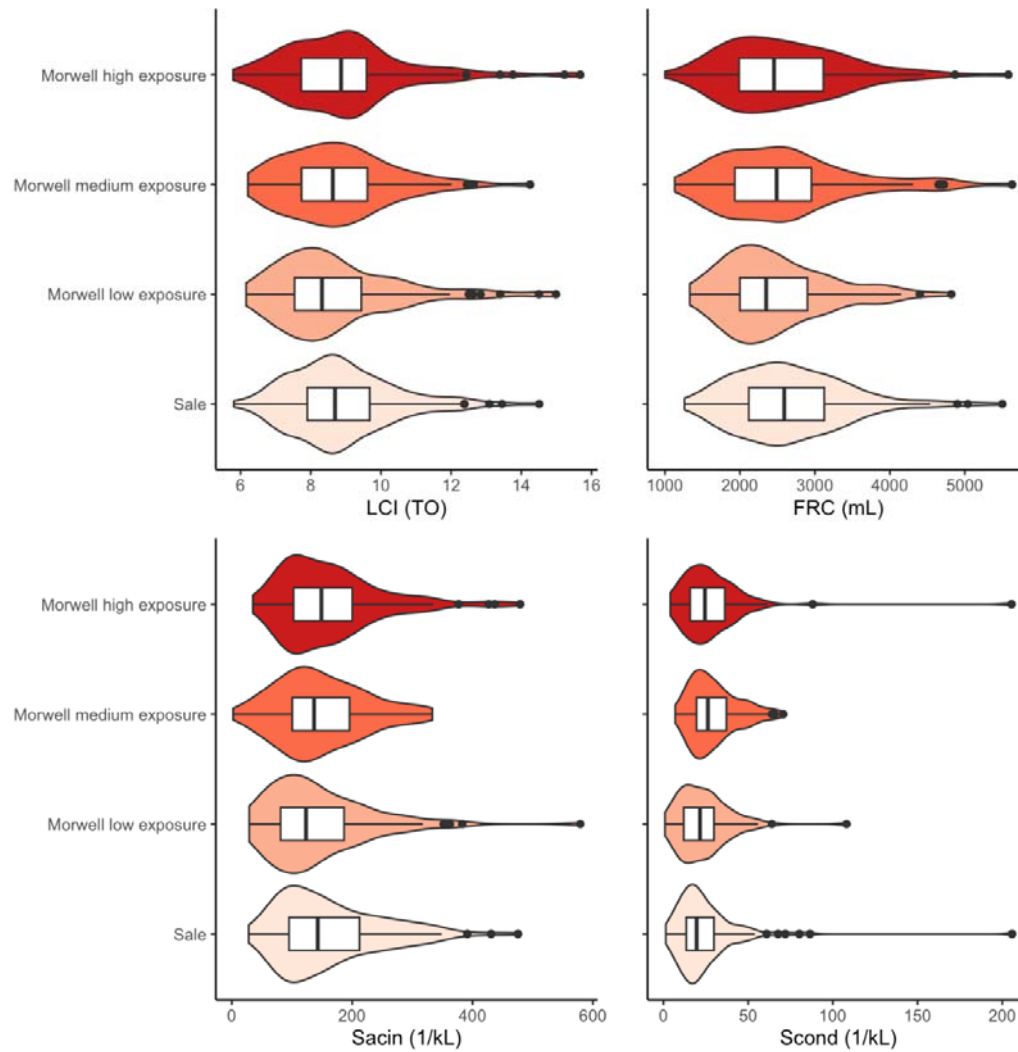

Figure 1. Distributions (boxplots and violin plots) of MBW outcomes by mine fire exposure groups.

Note: Missing data include 40 records for LCI and FRC, 42 records for Sacin and 56 records for Scond. Abbreviations: LCI = Lung Clearance Index, FRC = Functional Residual Capacity, Sacin = acinar ventilation heterogeneity, Scond = conductive ventilation heterogeneity.

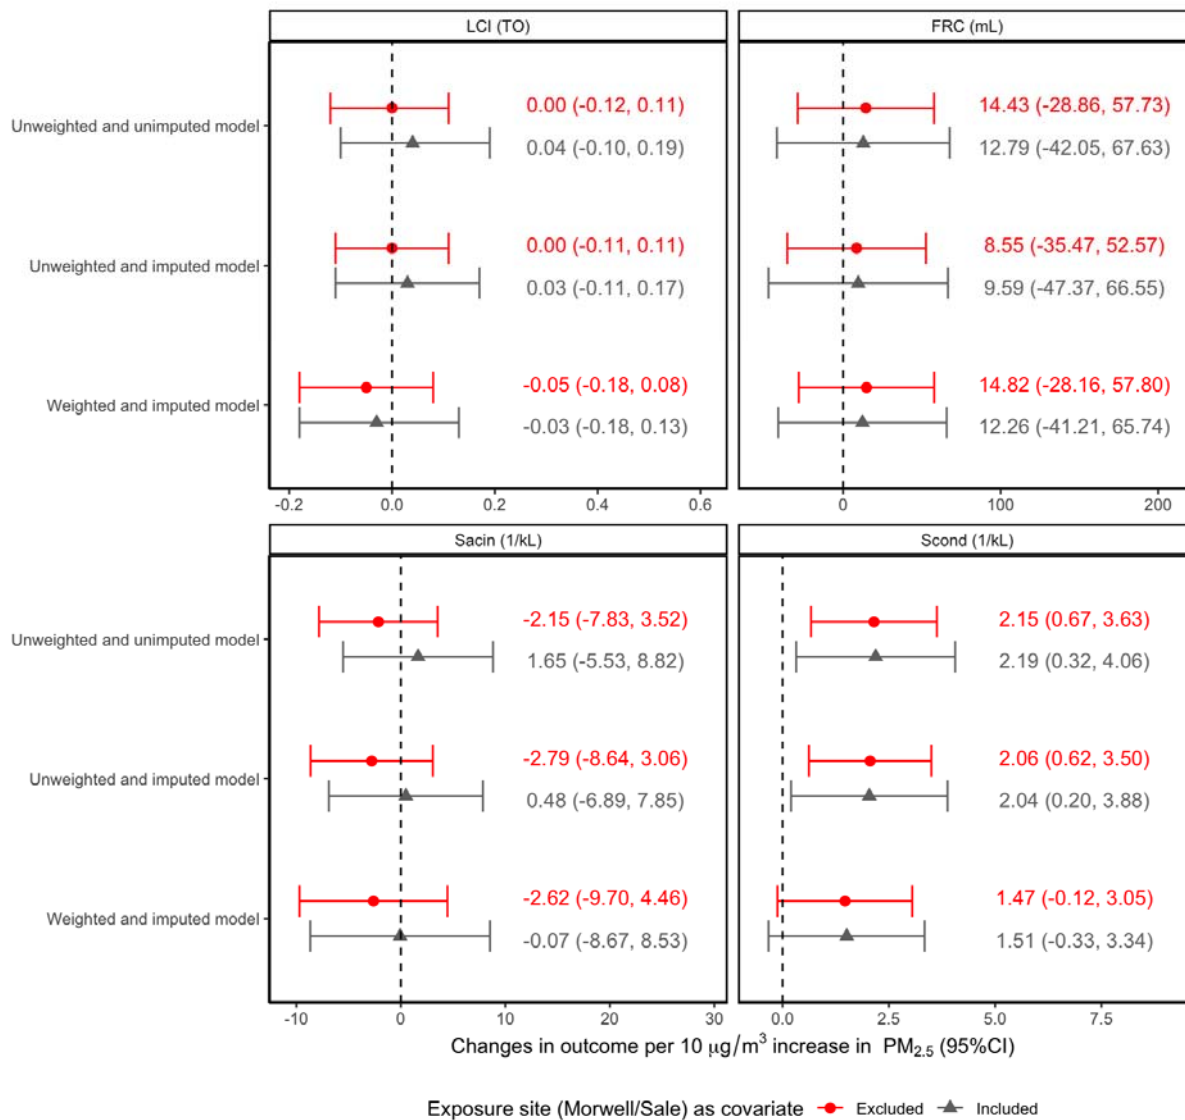

Figure 2. Outcomes associated with 10 µg/m<sup>3</sup> increase in mean mine fire-related PM<sub>2.5</sub> exposure estimated from different models.

Note: all coefficients were estimated from multivariate linear regressions adjusting for age, sex, height, weight, employment, education, smoking, asthma or COPD and work exposure. Missing data included 40 records for LCI and FRC, 42 records for Sacin, 56 records for Scond and 6 records for education. Abbreviations: LCI = Lung Clearance Index, FRC = Functional Residual Capacity, Sacin = acinar ventilation heterogeneity, Scond = conductive ventilation heterogeneity



## Supplementary Material

Table S1. Differences between those who had acceptable MBW tests results and those who were not tested for MBW or had no acceptable results.

| Characteristic                                                                | With MBW<br>measure<br>N=479 | Without<br>MBW<br>measure<br>N=40 | p-value |
|-------------------------------------------------------------------------------|------------------------------|-----------------------------------|---------|
| Age group, n (%)                                                              |                              |                                   | <0.001  |
| 18-44 years                                                                   | 147 (31%)                    | 4 (10%)                           |         |
| 45-64 years                                                                   | 196 (41%)                    | 14 (35%)                          |         |
| ≥ 65 years                                                                    | 136 (28%)                    | 22 (55%)                          |         |
| Male, n (%)                                                                   | 191 (40%)                    | 22 (55%)                          | 0.062   |
| Ethnicity Caucasian / White, n (%)                                            | 474 (99%)                    | 40 (100%)                         | 0.516   |
| Employed                                                                      | 223 (47%)                    | 6 (15%)                           | <0.001  |
| Certificate, University or other Tertiary Institute degree, n (%)             | 274 (58%)                    | 17 (44%)                          | 0.085   |
| Body Mass Index (BMI), n (%)                                                  |                              |                                   | 0.842   |
| Underweight/Normal (BMI<25 kg/m <sup>2</sup> )                                | 90 (19%)                     | 9 (23%)                           |         |
| Overweight (25≤BMI<30 kg/m <sup>2</sup> )                                     | 155 (32%)                    | 12 (30%)                          |         |
| Obese (BMI≥30 kg/m <sup>2</sup> )                                             | 234 (49%)                    | 19 (48%)                          |         |
| Smoking status, n (%)                                                         |                              |                                   | 0.769   |
| Non-smoker                                                                    | 230 (48%)                    | 19 (48%)                          |         |
| Ex-smoker                                                                     | 173 (36%)                    | 13 (33%)                          |         |
| Current smoker                                                                | 76 (16%)                     | 8 (20%)                           |         |
| Spirometric COPD or self-reported asthma attack in the last 12 months, n (%)  | 228 (48%)                    | 23 (57%)                          | 0.229   |
| Historical occupational exposure, n (%)                                       | 187 (39%)                    | 18 (45%)                          | 0.459   |
| Age/ years, mean (SD)                                                         | 54(16)                       | 66 (15)                           | <0.001  |
| Height / cm, mean (SD)                                                        | 166 (9)                      | 165 (9)                           | 0.307   |
| Weight / kg, mean (SD)                                                        | 85 (18)                      | 82 (19)                           | 0.302   |
| Mean exposure to fire related PM <sub>2.5</sub> µg/m <sup>3</sup> , mean (SD) | 10 (12)                      | 13 (14)                           | 0.144   |

Missing data include 6 records for education level. SD = Standard Deviation

Table S2. Distribution mean (SD) of outcomes by mine fire exposure groups.

| <b>Outcome variables</b> | <b>Sale<br/>N=166</b> | <b>Morwell low<br/>exposure<br/>N=97</b> | <b>Morwell<br/>medium<br/>exposure<br/>N=100</b> | <b>Morwell high<br/>exposure<br/>N=116</b> | <b>p-value</b> |
|--------------------------|-----------------------|------------------------------------------|--------------------------------------------------|--------------------------------------------|----------------|
| LCI (TO)                 | 8.9 (1.5)             | 8.7 (1.8)                                | 8.8 (1.5)                                        | 9.0 (1.8)                                  | 0.741          |
| FRC (mL)                 | 2668 (758)            | 2482 (715)                               | 2591 (892)                                       | 2596 (814)                                 | 0.335          |
| Sacin (1/kL)             | 162.2 (86.2)          | 145.6 (89.5)                             | 149.0 (74.5)                                     | 163.8 (84.7)                               | 0.258          |
| Scond (1/kL)             | 24.2 (20.6)           | 23.8 (16.0)                              | 29.8 (14.2)                                      | 28.3 (21.9)                                | 0.047          |

Missing data included 40 records for LCI and FRC, 42 records for Sacin and 56 records for Scond.

Table S3. Results from multivariable linear regression models for average Scond (1/kL) excluding Morwell as a predictor

| Predictors                                                            | Unweighted and unimputed model |                  | Unweighted and imputed model |                  | Weighted and imputed model |                  |
|-----------------------------------------------------------------------|--------------------------------|------------------|------------------------------|------------------|----------------------------|------------------|
|                                                                       | Coef (95% CI)                  | p-value          | Coef (95% CI)                | p-value          | Coef (95% CI)              | p-value          |
| Exposure to PM <sub>2.5</sub>                                         | <b>2.15 (0.67, 3.63)</b>       | <b>0.004</b>     | <b>2.06 (0.62, 3.50)</b>     | <b>0.005</b>     | 1.47 (-0.12, 3.05)         | 0.070            |
| Age (per 10 years)                                                    | <b>2.73 (1.43, 4.03)</b>       | <b>&lt;0.001</b> | <b>2.73 (1.45, 4.01)</b>     | <b>&lt;0.001</b> | <b>2.38 (1.16, 3.61)</b>   | <b>&lt;0.001</b> |
| Height                                                                | 0.07 (-0.21, 0.35)             | 0.628            | 0.05 (-0.23, 0.32)           | 0.732            | 0.01 (-0.27, 0.28)         | 0.958            |
| Weight                                                                | 0.07 (-0.03, 0.17)             | 0.188            | 0.07 (-0.03, 0.18)           | 0.161            | 0.10 (0.02, 0.19)          | 0.020            |
| Male                                                                  | -2.10 (-7.41, 3.21)            | 0.437            | -1.42 (-6.77, 3.93)          | 0.601            | -0.43 (-5.45, 4.59)        | 0.866            |
| Smoking status                                                        |                                |                  |                              |                  |                            |                  |
| Non-smoker                                                            | Ref                            |                  | Ref                          |                  | Ref                        |                  |
| Ex-smoker                                                             | 3.11 (-0.74, 6.96)             | 0.113            | 2.86 (-0.93, 6.65)           | 0.138            | 3.37 (-0.60, 7.34)         | 0.096            |
| Current smoker                                                        | 0.83 (-4.44, 6.09)             | 0.758            | 1.43 (-3.74, 6.60)           | 0.588            | 2.41 (-2.21, 7.03)         | 0.305            |
| Spirometric COPD or self-reported asthma attack in the last 12 months | 3.15 (-0.35, 6.65)             | 0.078            | 2.49 (-0.97, 5.94)           | 0.158            | 1.70 (-1.71, 5.11)         | 0.326            |
| Employed                                                              | -0.50 (-4.38, 3.38)            | 0.800            | -0.55 (-4.40, 3.30)          | 0.778            | -1.42 (-5.02, 2.17)        | 0.437            |
| Certificate, University or other Tertiary Institute degree            | 1.97 (-1.63, 5.58)             | 0.283            | 1.99 (-1.47, 5.44)           | 0.259            | 1.90 (-1.75, 5.56)         | 0.306            |
| Occupational exposure                                                 | -2.01 (-5.91, 1.89)            | 0.313            | -2.40 (-6.29, 1.48)          | 0.224            | -1.03 (-4.72, 2.66)        | 0.582            |

Note: all coefficients were estimated from multivariate linear regression adjusted for age, gender, height, weight, employment, education, smoking status, asthma and COPD status and occupational exposure. Missing data included 56 records for Scond and 6 records for education level.

Abbreviation: Scond = conductive ventilation heterogeneity

Table S4. Multivariable model of Sacin (1/kL) associated with 10 µg/m<sup>3</sup> increase in mean mine fire related PM<sub>2.5</sub> exposure excluding Morwell as a predictor (unweighted and unimputed)

| <b>Predictors</b>                                                     | <b>Coef (95% CI)</b>     | <b>p-value</b>   |
|-----------------------------------------------------------------------|--------------------------|------------------|
| Exposure to PM <sub>2.5</sub> (per 10 µg/m <sup>3</sup> )             | -2.15 (-7.83, 3.52)      | 0.457            |
| Age (per 10 years)                                                    | <b>19.8 (14.9, 24.8)</b> | <b>&lt;0.001</b> |
| Height                                                                | -0.90 (-1.96, 0.16)      | 0.095            |
| Weight                                                                | 0.15 (-0.24, 0.53)       | 0.451            |
| Male                                                                  | <b>23.4 (3.26, 43.6)</b> | <b>0.023</b>     |
| Smoking status                                                        |                          |                  |
| Non-smoker                                                            | Ref                      |                  |
| Ex-smoker                                                             | <b>31.9 (17.2, 46.6)</b> | <b>&lt;0.001</b> |
| Current smoker                                                        | <b>55.9 (35.8, 76.1)</b> | <b>&lt;0.001</b> |
| Spirometric COPD or self-reported asthma attack in the last 12 months | <b>31.1 (17.7, 44.5)</b> | <b>&lt;0.001</b> |
| Employed                                                              | -9.13 (-23.9, 5.66)      | 0.226            |
| Certificate, University or other Tertiary Institute degree            | -6.64 (-20.3, 7.04)      | 0.341            |
| Occupational exposure                                                 | -1.37 (-16.1, 13.4)      | 0.855            |

Note: Coefficients were estimated from unweighted and unimputed multivariate linear regression. Missing data included 42 records for Sacin and 6 records for education level.

Abbreviation: Sacin = acinar ventilation heterogeneity
