## Ventilation heterogeneity is increased in adults exposed to coal mine fire-related PM<sub>2.5</sub>

Thomas McCrabb BBiomedSc<sup>1,2</sup>, Brigitte Borg BAppSc CRFS ACP<sup>1,2</sup>, Caroline X. Gao BEng MBiostats PhD<sup>1,3</sup>, Catherine Smith BSc(Hons) MPH MSc<sup>1,3</sup>, David Brown BComp GradDipEd AssocDipAppSc<sup>1</sup>, Jillian Ikin BA(Psych) PhD<sup>1</sup>, Annie Makar BBiomedSc MHSM CRFS<sup>2</sup>, Tyler Lane BA MSc DPhil<sup>1</sup>, Michael J. Abramson MBBS(Hons) PhD FRACP<sup>1</sup>, Bruce R Thompson BAppSci PhD<sup>4</sup>

<sup>1</sup> School of Public Health & Preventive Medicine, Monash University, Melbourne, Australia

<sup>2</sup> Respiratory Medicine, Alfred Health, Melbourne, Australia

<sup>3</sup> Centre for Youth Mental Health (Orygen), University of Melbourne

<sup>4</sup> Melbourne School of Health Sciences, The University of Melbourne, Melbourne, Australia

Correspondence to:

Professor Michael Abramson  
School of Public Health & Preventive Medicine  
Monash University  
553 St Kilda Rd, Melbourne, Vic 3004  
Australia  
e-mail: [michael.abramson@monash.edu](mailto:michael.abramson@monash.edu)

Funding information:

This study was funded by the Victorian Department of Health. The paper presents the views of the authors and does not present the views of the Department.

## Abstract

**Background and Objectives:** The Hazelwood Health Study was set up to study long term health effects of a mine fire that blanketed residents of the Latrobe Valley with smoke for 45 days in 2014. The Respiratory Stream specifically assessed the impact of fine particulate matter <2.5 $\mu$ m diameter (PM<sub>2.5</sub>) exposure from mine fire smoke on lung health. The multiple breath nitrogen washout (MBW) test assesses ventilation heterogeneity, which may detect early airways dysfunction not identified using standard tests such as spirometry. This analysis assessed the association of PM<sub>2.5</sub> exposure with measures of ventilation heterogeneity.

**Methods:** Exposed (Morwell) and unexposed (Sale) participants were recruited 3.5-4 years after the fire from those who had participated in an Adult Survey. MBW was performed to measure lung clearance index (LCI), functional residual capacity (FRC), acinar (Sacin) and conductive (Scond) ventilation heterogeneity. PM<sub>2.5</sub> exposure was estimated with emission and chemical transport models. Multivariate linear regression models were fitted controlling for confounders.

**Results:** We recruited 519 participants. MBW tests were conducted on 504 participants with 479 acceptable test results (40% male; 313 exposed, 166 unexposed). Exposure to mine fire-related PM<sub>2.5</sub> was associated with increasing Scond ( $\beta=2.15/\text{kL}$ , 95%CI: 0.67-3.63,  $p=0.006$ ), which was comparable to the estimated effect on Scond of 7.9 years of aging. No other MBW outcomes were significant.

**Conclusions:** Increasing exposure to PM<sub>2.5</sub> was associated with increased ventilation heterogeneity in the conductive region of the lungs 4 years after the event.

**Keywords:** air pollution, multiple breath nitrogen washout, mine fire

Word count for abstract: 235

Word count for body of text: 2450
